# Supplementary material for: KTBoost: Combined Kernel and Tree Boosting
Source: Springer Nature journal article supplement (doi:10.1007/s11063-021-10434-9), 2021-02-11
Supplement: MOESM1 [file 18876424]

---

**Supplementary material**

Results when the shrinkage parameter is not used for choosing the base learner

**Table 3** Comparison of KTBoost with tree and kernel boosting using test mean square error (regression) and test error rate (classification). In parentheses are approximate standard deviations. Below are average ranks of the methods over the different datasets. A p-value of a Friedman test with an Iman and Davenport correction for comparing the different algorithms is also reported. The last row shows Holm-Bonferroni corrected p-values of sign tests for pairwise comparison of the KTBoost algorithm with tree and kernel boosting.

| Data                 | KTBoost                    | Tree                       | Kernel                     |
|----------------------|----------------------------|----------------------------|----------------------------|
| abalone              | <b>4.63</b> (0.246)        | 5.07 (0.261)               | 4.64 (0.255)               |
| aileron              | 2.64e-08 (6.19e-10)        | 8.11e-08 (2.39e-09)        | <b>2.64e-08</b> (6.19e-10) |
| bank8FM              | <b>0.000908</b> (3.89e-05) | 0.000945 (2.47e-05)        | 0.000945 (5.83e-05)        |
| elevators            | <b>4.71e-06</b> (2.16e-07) | 5.66e-06 (1.44e-07)        | 5.18e-06 (3.89e-07)        |
| energy               | <b>0.28</b> (0.039)        | 0.335 (0.093)              | 1.3 (0.377)                |
| housing              | <b>12.8</b> (3.42)         | 15.1 (3.23)                | 13.6 (2.51)                |
| liberty              | <b>14.5</b> (0.299)        | 14.5 (0.314)               | 15.2 (0.345)               |
| NavalT               | 6.51e-09 (1.15e-09)        | 1.15e-06 (1.58e-07)        | <b>6.51e-09</b> (1.15e-09) |
| parkinsons           | 73.4 (2.02)                | 81.1 (2.44)                | <b>73.3</b> (1.91)         |
| puma32h              | 6.51e-05 (2.27e-06)        | <b>6.51e-05</b> (2.13e-06) | 0.000695 (2.2e-05)         |
| sarcos               | <b>7.71</b> (0.224)        | 9.6 (0.207)                | 17.8 (0.586)               |
| wine                 | <b>0.463</b> (0.0124)      | 0.471 (0.0169)             | 0.506 (0.0106)             |
| adult                | <b>0.128</b> (0.00304)     | 0.128 (0.00313)            | 0.163 (0.00512)            |
| cancer               | <b>0.0349</b> (0.00873)    | 0.0415 (0.0153)            | 0.0358 (0.0107)            |
| ijcnn                | <b>0.0122</b> (0.000567)   | 0.0123 (0.000702)          | 0.0387 (0.00516)           |
| ionosphere           | <b>0.0855</b> (0.018)      | 0.103 (0.0226)             | 0.107 (0.0239)             |
| sonar                | 0.194 (0.0394)             | 0.223 (0.05)               | <b>0.193</b> (0.0491)      |
| car                  | <b>0.0405</b> (0.0059)     | 0.0411 (0.00685)           | 0.041 (0.00624)            |
| epileptic            | <b>0.351</b> (0.00543)     | 0.373 (0.00614)            | 0.442 (0.0265)             |
| glass                | 0.322 (0.0702)             | <b>0.315</b> (0.0589)      | 0.344 (0.0581)             |
| satimage             | <b>0.0892</b> (0.00399)    | 0.112 (0.00504)            | 0.0903 (0.00417)           |
| Average rank         | 1.29                       | 2.43                       | 2.29                       |
| p-val Friedman test  | 5.48e-05                   |                            |                            |
| Adj. p-val sign test |                            | 0.000664                   | 0.0144                     |
